# Supplementary material for: A fluorescent probe for sequential sensing of MnO4− and Cr2O72− ions in aqueous medium based on a UCNS/TMB nanosystem
Source: Royal Society of Chemistry journal article supplement (doi:10.1039/c9dt00360f), 2019-01-01
Supplement: c9dt00360f1.pdf [file c9dt00360f1.pdf]

Supporting Information

## A fluorescent probe for sequential sensing of $\text{MnO}_4^-$ and $\text{Cr}_2\text{O}_7^{2-}$ ions in aqueous medium based on UCNS/TMB nanosystem

Haiquan Liu <sup>a,b</sup>, Jianing Rong <sup>a</sup>, Yao Song <sup>a</sup>, Guoqiong Shen <sup>a</sup>, Wen Gu <sup>a,b,\*</sup>, Xin Liu <sup>a,b,\*</sup>

<sup>a</sup> College of Chemistry, Nankai University, Tianjin 300071, China

<sup>b</sup> Collaborative Innovation Center of Chemical Science and Engineering, Key Laboratory of Advanced Energy Materials Chemistry (MOE), College of Chemistry, Nankai University, Tianjin 300071, China

E-mail: guwen68@nankai.edu.cn, liuxin64@nankai.edu.cn

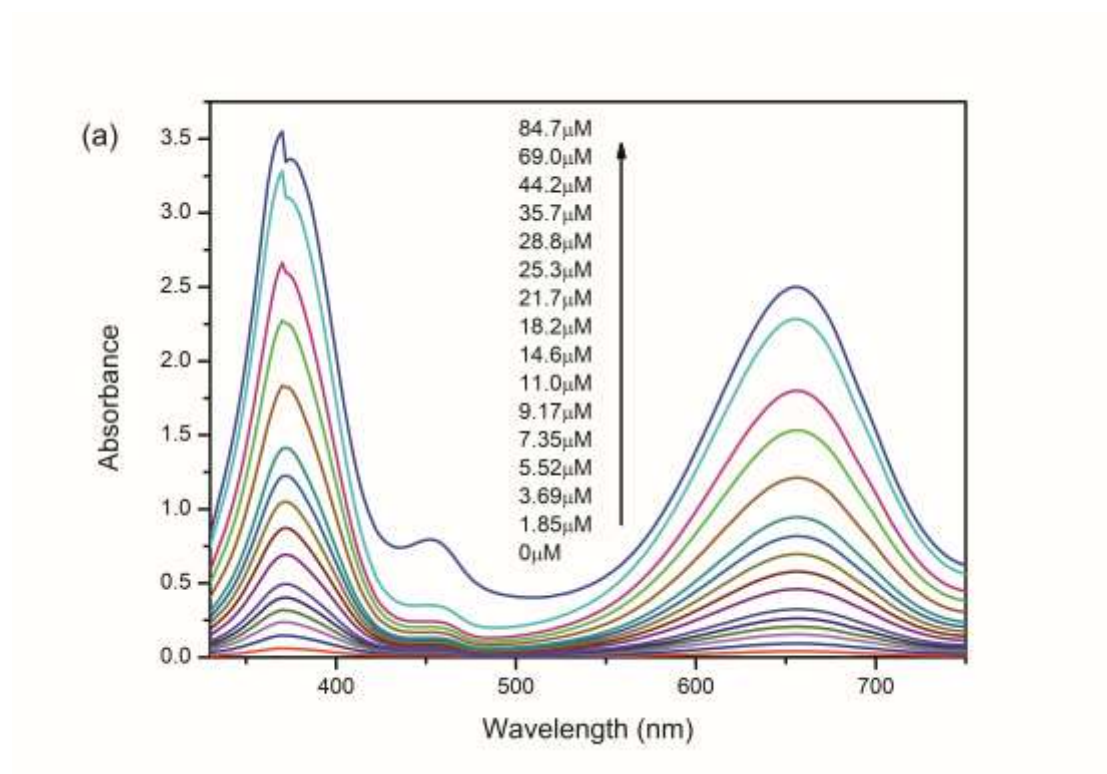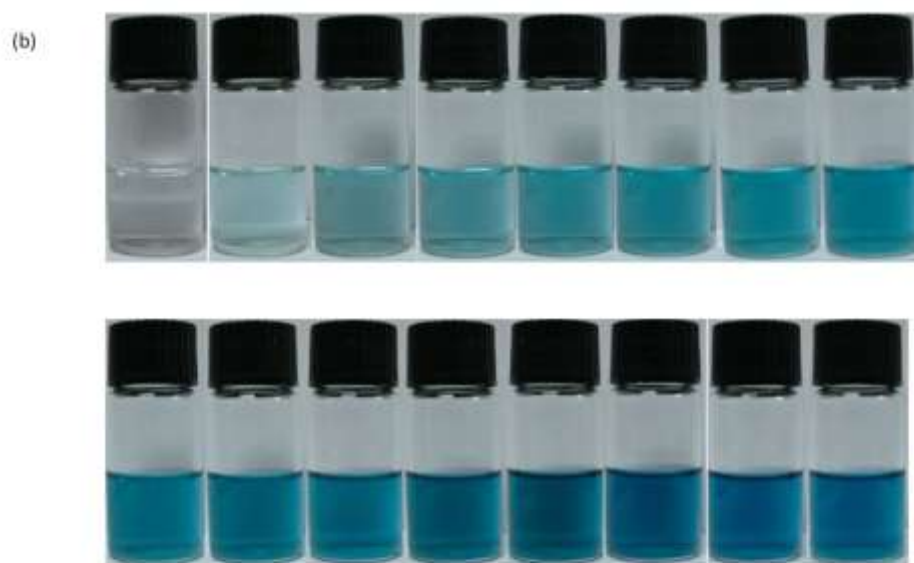

Fig. S1 Absorption spectra (a) and photographs (b) of UCNS-oxTMB nanosystem with addition of 0, 1.85, 3.69, 5.52, 7.35, 9.17, 11.0, 14.6, 18.2, 21.7, 25.3, 28.8, 35.7, 44.2, 69.0 and 84.7  $\mu\text{M}$  of  $\text{MnO}_4^-$  ions..

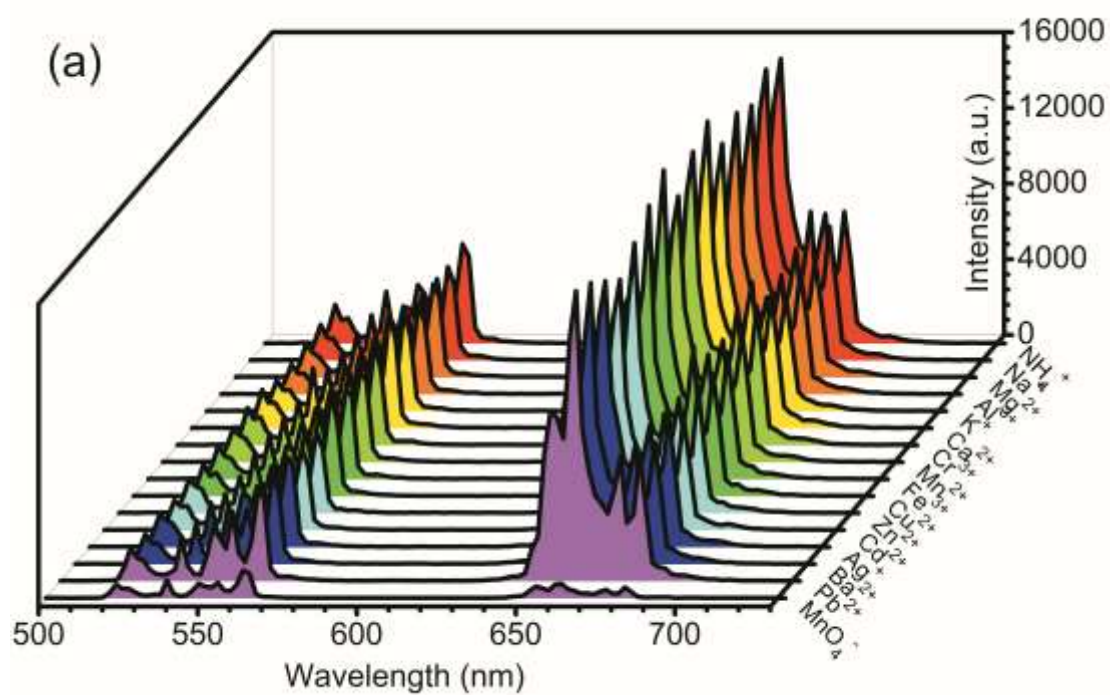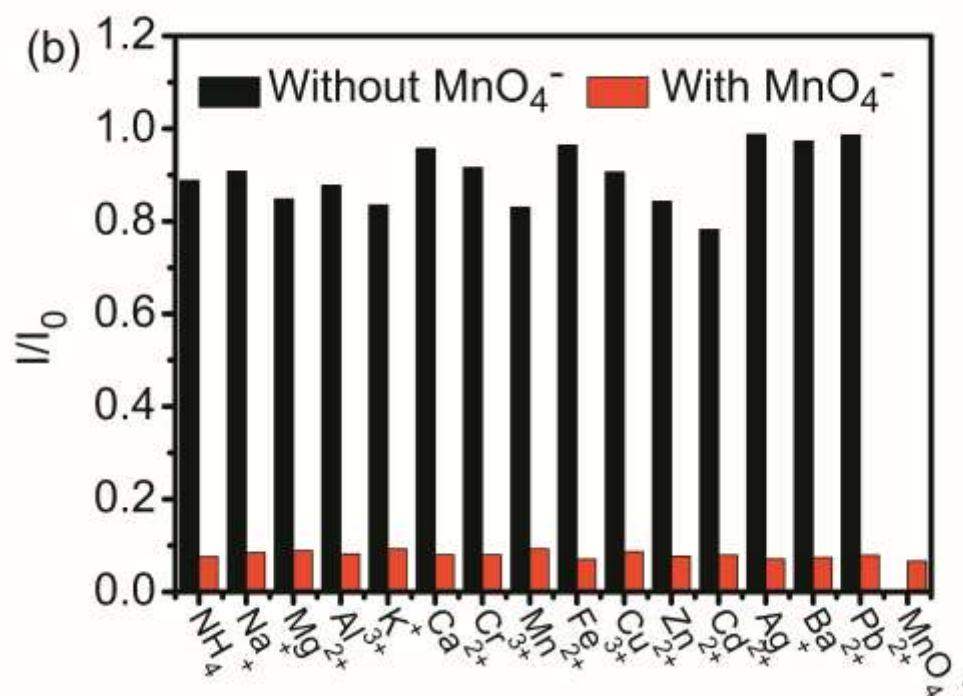

Fig. S 2 (a) Fluorescence spectra of nanosystem added with different cations. (b) Selectivity of  $\text{MnO}_4^-$  based on the ratio of  $I$  and  $I_0$ .

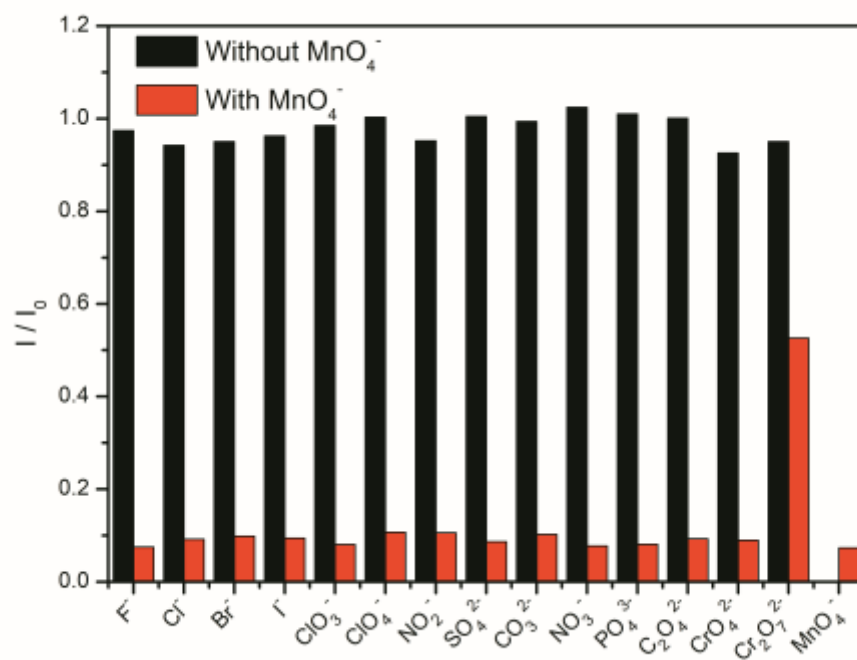

Fig. S3 Selectivity toward  $\text{MnO}_4^-$  without the presense of  $\text{Pb}^{2+}$ .

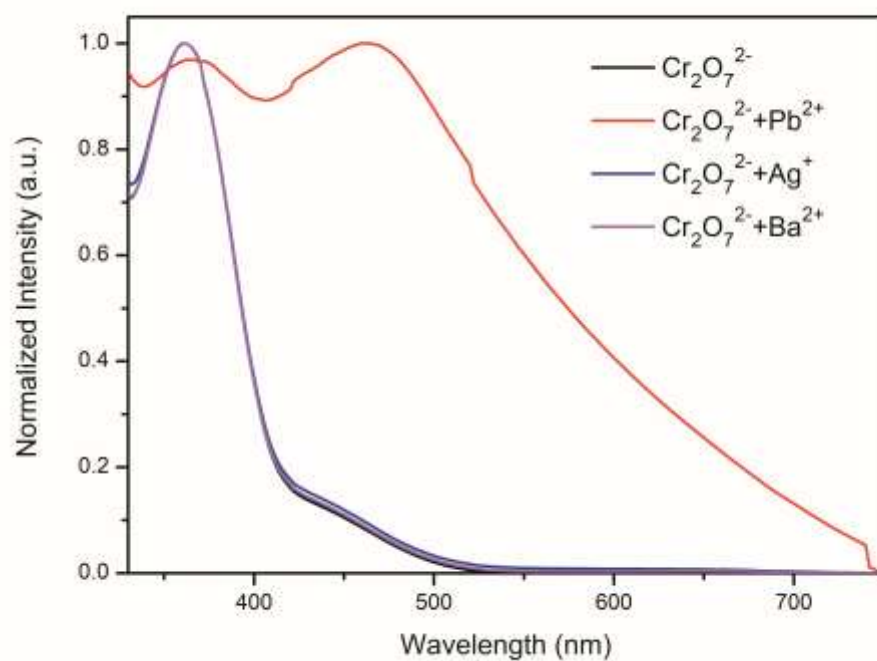

Fig. S4 The absorption spectra of Cr<sub>2</sub>O<sub>7</sub><sup>2-</sup> ions with various masking agents include Pb<sup>2+</sup>, Ag<sup>+</sup> and Ba<sup>2+</sup>.

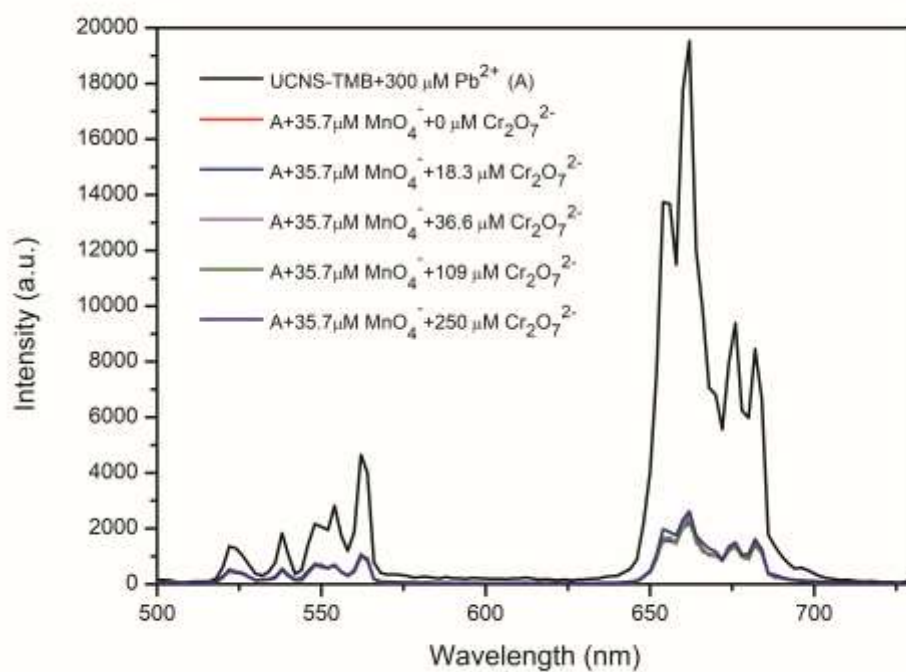

Fig. S5 The UCL spectra after different concentrations of  $\text{Cr}_2\text{O}_7^{2-}$  ions added into  $\text{MnO}_4^-$ -sensing nanosystem.

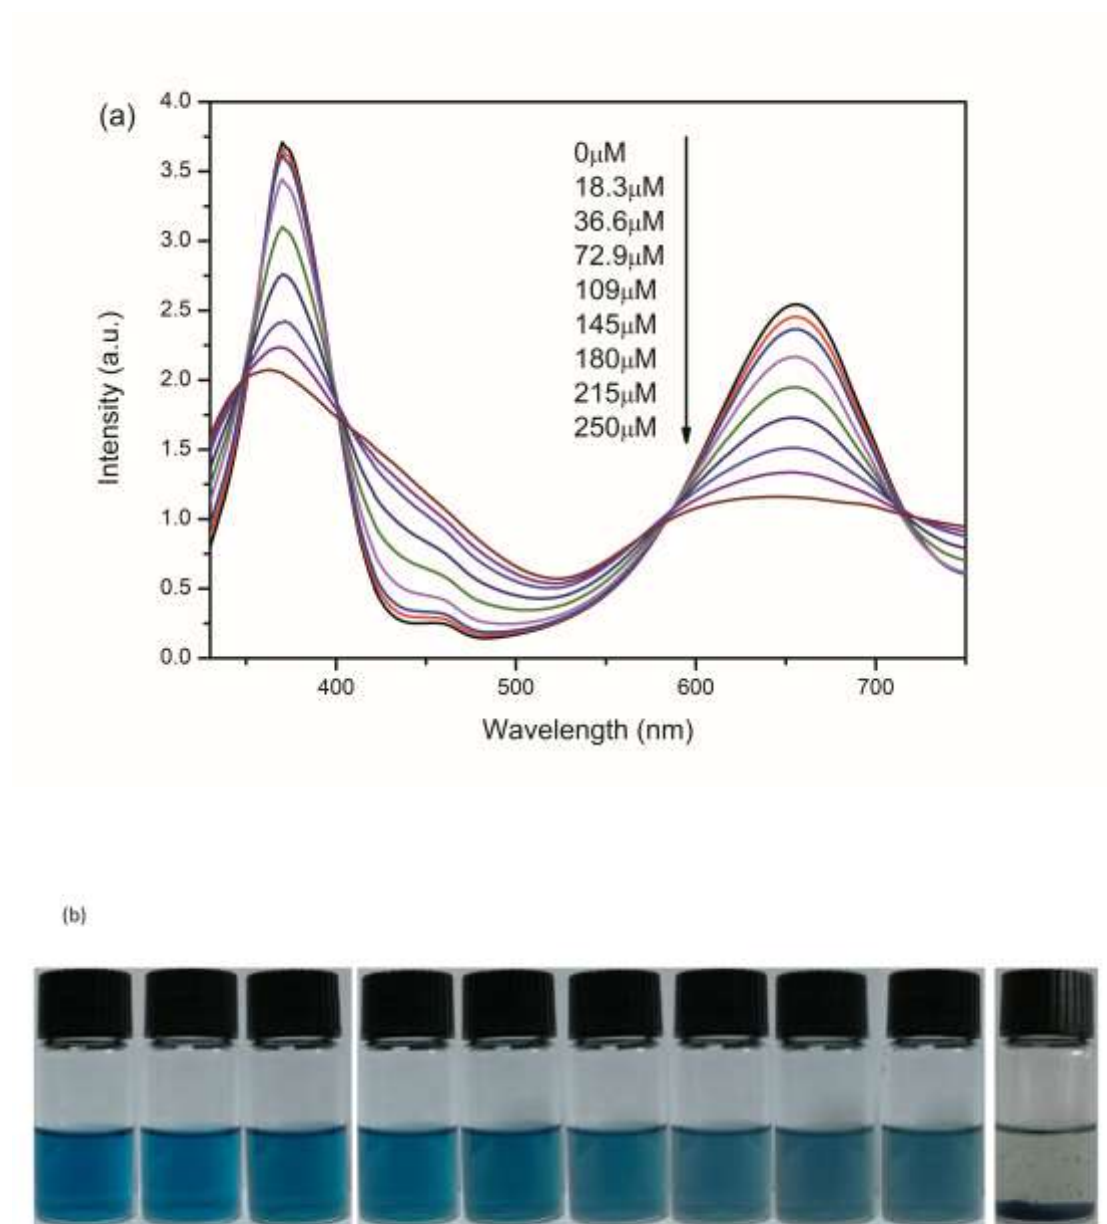

Fig. S6 Absorption spectra (a) and photographs (b) of UCNS-oxTMB nanosystem with addition of 0, 18.3, 36.6, 72.9, 109, 145, 180, 215 and 250  $\mu\text{M}$  of  $\text{Cr}_2\text{O}_7^{2-}$  ions, and last photograph was taken after standing for 1h.



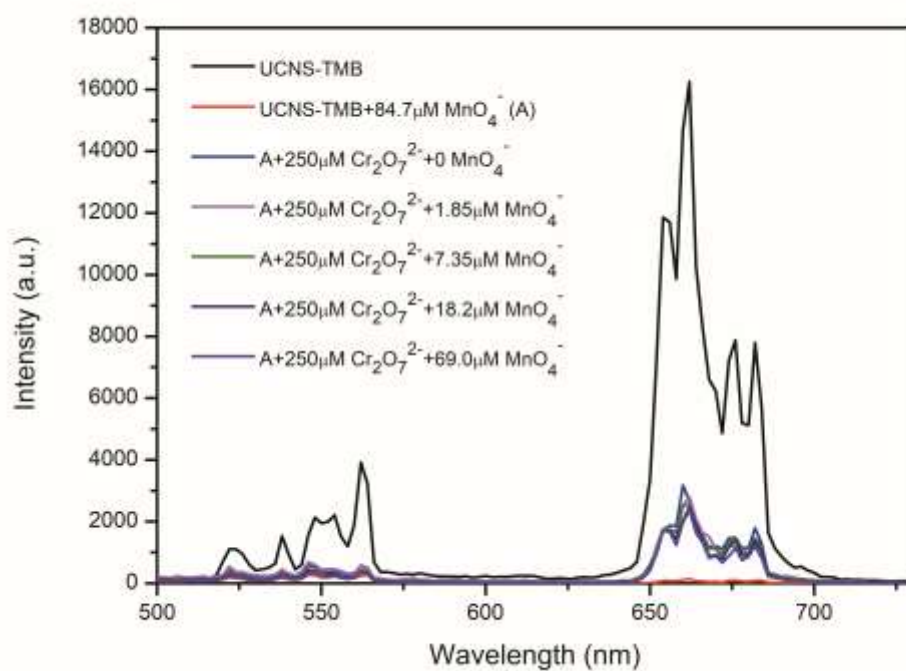

Fig. S8 The UCL spectra after different concentrations of  $\text{MnO}_4^-$  ions added into  $\text{Cr}_2\text{O}_7^{2-}$ -sensing nanosystem.

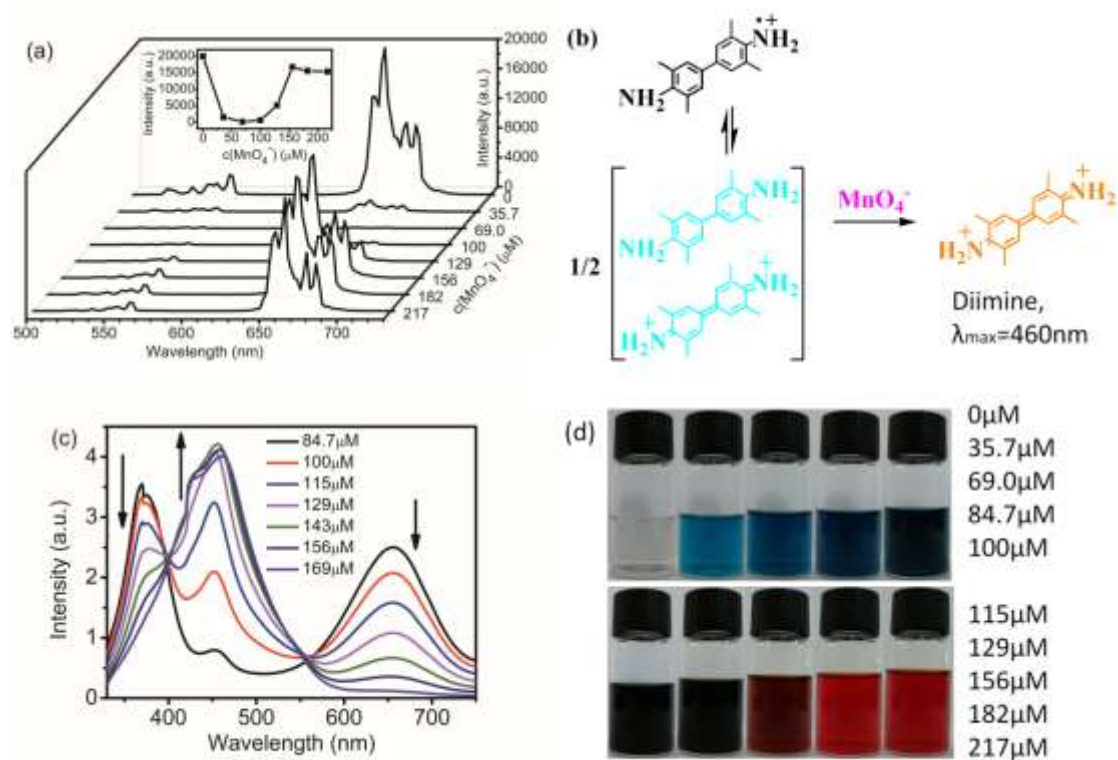

Fig. S9 (a) Fluorescence spectra of nanosystem with different concentrations of  $\text{MnO}_4^-$  under 980 nm excitation, inset shows the UCL intensity change at 662 nm. (b) Mechanism of oxTMB oxidation. (c) The absorption spectra of oxTMB with the addition of different concentrations of  $\text{MnO}_4^-$ . (d) photographs of UCNS-oxTMB nanosystem with addition of different concentration of  $\text{MnO}_4^-$  ions.

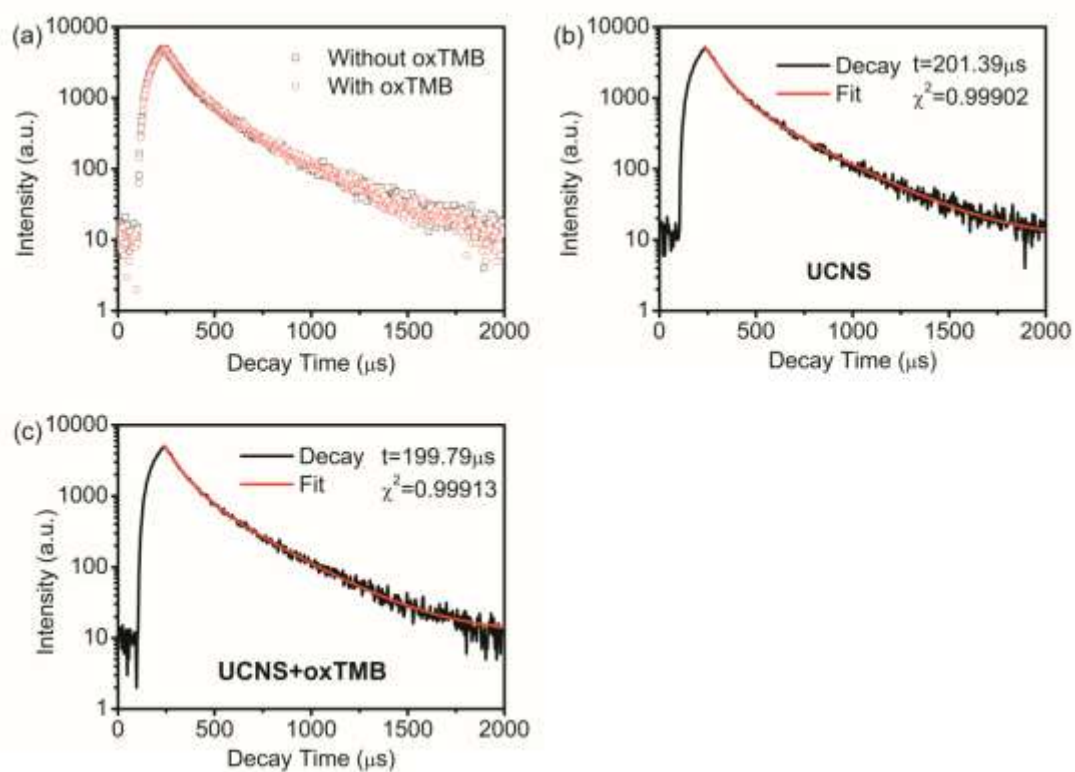

Fig. S10 The UC fluorescence lifetimes of UCNS in the absence (black line) and presence (red line) of 0.5 mM oxTMB (a). The exponential fitting of the lifetimes of UCNS in the absence (b) and presence (c) of oxTMB.

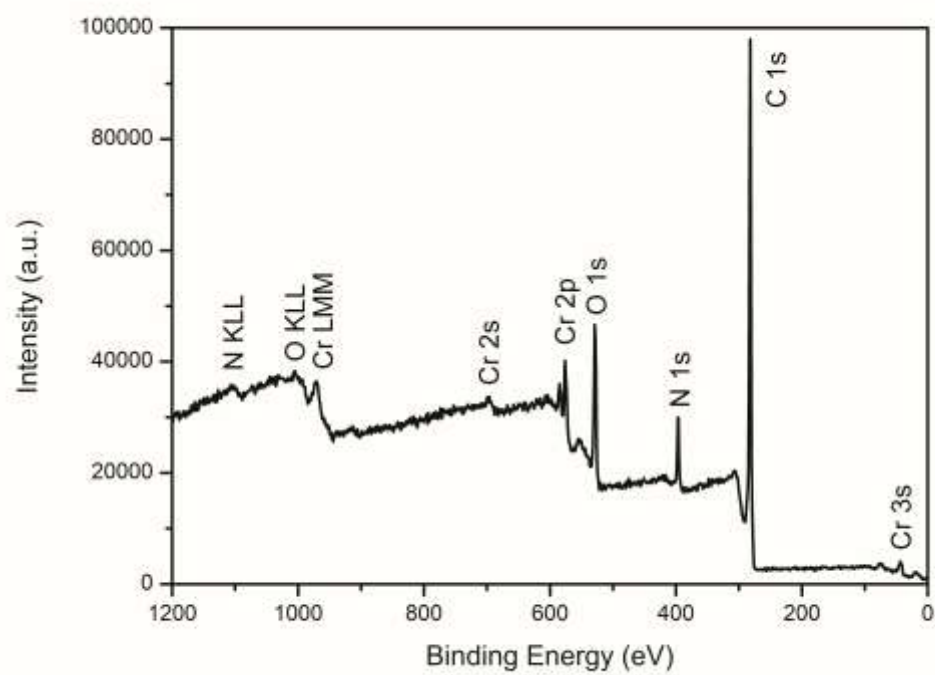

Fig. S11 XPS spectra of 2oxTMB-Cr<sub>2</sub>O<sub>7</sub> complex.

Table. S1 ICP and elemental analyze (EA) results of 2oxTMB-Cr2O7 complex.

| Elements    | Theoretical mass content of TMB-Cr <sub>2</sub> O <sub>7</sub> (%) | Theoretical mass content of 2TMB-Cr <sub>2</sub> O <sub>7</sub> (%) | Actual mass content in xTMB-Cr <sub>2</sub> O <sub>7</sub> sample (%) | Calculated x value |
|-------------|--------------------------------------------------------------------|---------------------------------------------------------------------|-----------------------------------------------------------------------|--------------------|
| Cr from ICP | 22.89                                                              | 15.01                                                               | 16.77±0.0583                                                          | 1.8883             |
| C from EA   | 44.30                                                              | 55.49                                                               | 51.51±0.0515                                                          | 1.8491             |
| H from EA   | 3.99                                                               | 5.24                                                                | 5.11±0.00511                                                          | 1.948              |
| N from EA   | 6.17                                                               | 8.09                                                                | 7.39±0.00739                                                          | 1.8177             |
